# Supplementary material for: Electrochemical Characterization of Charged Membranes from Different Materials and Structures via Membrane Potential Analysis
Source: MDPI journal article supplement (doi:10.3390/membranes13080739), 2023-08-17
Supplement: s1 [file s1]

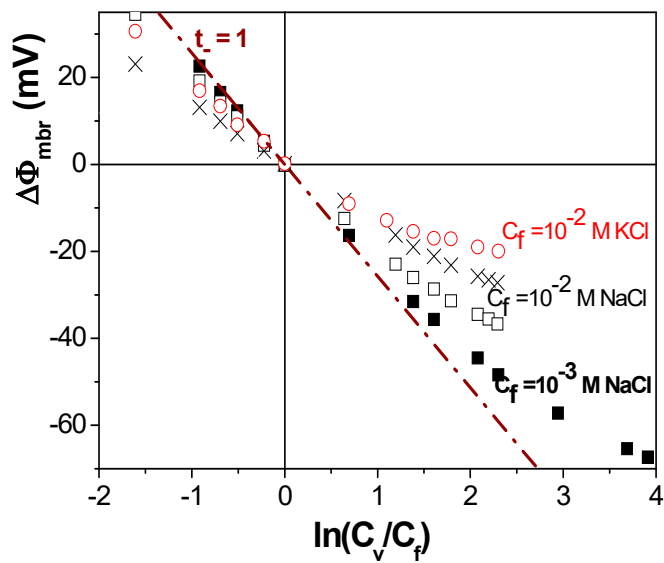

**Figure S1.** Membrane potential as a function of solution concentration ratio for nanoporous alumina membrane ALM-2.  $C_f = 0.01$  M NaCl: solutions stirred at 550 rpm ( $\square$ ) and non-stirred solutions ( $\times$ ); stirred solutions:  $C_f = 10^{-3}$  M NaCl ( $\blacksquare$ ) and  $C_f = 10^{-2}$  M KCl ( $\circ$ ). Theoretical values for an ideal cation-exchanger (dashed-dot line).

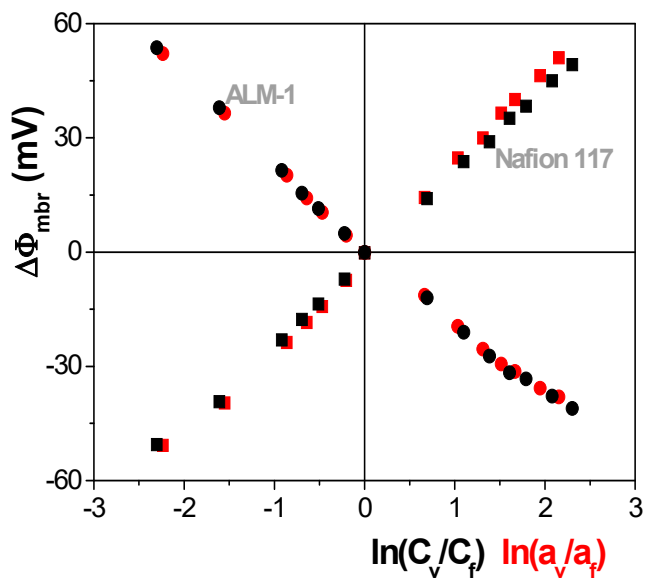

**Figure S2.** Membrane potentials as a function of:  $\ln(C_f/C_v)$  for Nafion-117 membrane ( $\blacksquare$ ) and ALM-1 membrane ( $\blacklozenge$ );  $\ln(a_i/a_v)$  for Nafion-117 membrane ( $\blacksquare$ ) and ALM-1 membrane ( $\blacklozenge$ ).

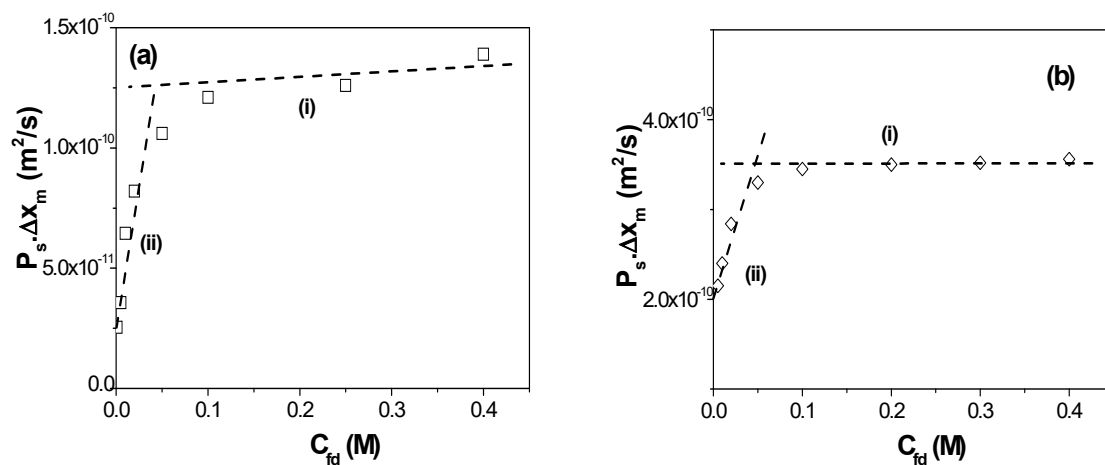

**Figure S3.** Salt diffusion as a function of feed NaCl concentration. (a) membrane RC-CE; (b) membrane ALM-1.

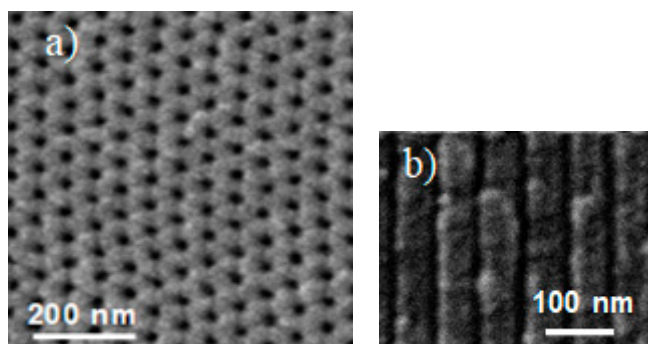

**Figure S4.** SEM micrographs for membrane ALM/Al<sub>2</sub>O<sub>3</sub>: a) surface and b) cross-section.

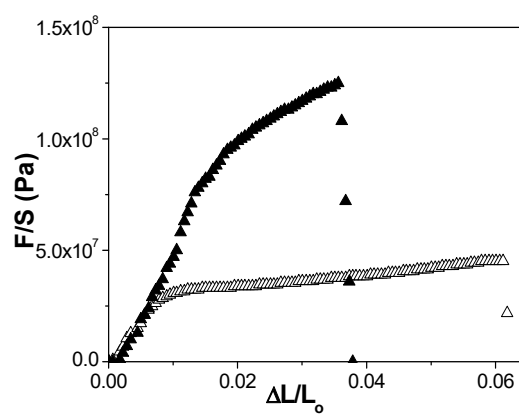

**Figure S5:** Strain-stress versus elongation for membranes: RC-CR ( $\Delta$ ) and RC-CE/AgNPs ( $\blacktriangle$ ).
